# Supplementary material for: Polymyxin B-functionalized phthalocyanine for chemo-photodynamic antibacterial therapy in enhanced wound healing
Source: Royal Society of Chemistry journal article supplement (doi:10.1039/d1nj00355k), 2021-01-01
Supplement: d1nj00355k1.pdf [file d1nj00355k1.pdf]

Supplementary Information

**Polymyxin B-functionalized phthalocyanine for chemo-  
photodynamic antibacterial therapy in enhanced wound healing**

Lin Mei\*, Zhenlong Xu, Zhiqiang Miao, Mengyao Yun, Yidan Luan, Dehong Yang  
and Luxi Xia

School of Materials and Chemical Engineering, Zhongyuan University of Technology,  
Zhengzhou 450007, P. R. China

\*E-mail: lins79@sina.com (Lin Mei).

## S1 Animal safety evaluation

The mice were anesthetized by intraperitoneal injection of 10% chloral hydrate and then shaved the hair on the left side of backs. A round full-thickness dermal wound with a diameter of 1.0 cm was created at the left side of each rat vertebra. A round gauze cloth close to the size of the wound was covered on the wound surface. Then 100  $\mu$ L of 1.0 mg/mL Pc-PB was smeared on the gauze with 680 nm light irradiation for 5 min. After administration of three days, blood was collected for routine blood test and clinical biochemical test.

Tab. S1 Effect of 1.0 mg/mL Pc-PB on blood cells of mice

| Group  | WBC ( $10^{12}/L$ ) | RBC ( $10^{12}/L$ ) | PLT ( $10^{12}/L$ ) |
|--------|---------------------|---------------------|---------------------|
| saline | $3.23 \pm 1.13$     | $9.49 \pm 0.70$     | $365.67 \pm 1.49$   |
| Pc-PB  | $2.69 \pm 0.36$     | $9.66 \pm 0.70$     | $390.67 \pm 1.40$   |

Tab. S2 Effect of 1.0 mg/mL Pc-PB on blood biochemical indexes in mice

| Group  | Urea<br>( $\mu\text{mol}\cdot\text{L}^{-1}$ ) | Grea<br>( $\mu\text{mol}\cdot\text{L}^{-1}$ ) | AST<br>( $\mu\text{mol}\cdot\text{L}^{-1}$ ) | AST1<br>( $\mu\text{mol}\cdot\text{L}^{-1}$ ) |
|--------|-----------------------------------------------|-----------------------------------------------|----------------------------------------------|-----------------------------------------------|
| saline | $8.94 \pm 1.79$                               | $13.57 \pm 2.50$                              | $146.29 \pm 3.27$                            | $58.71 \pm 5.20$                              |
| Pc-PB  | $9.11 \pm 2.00$                               | $11.50 \pm 2.75$                              | $156.33 \pm 2.14$                            | $70.17 \pm 9.23$                              |

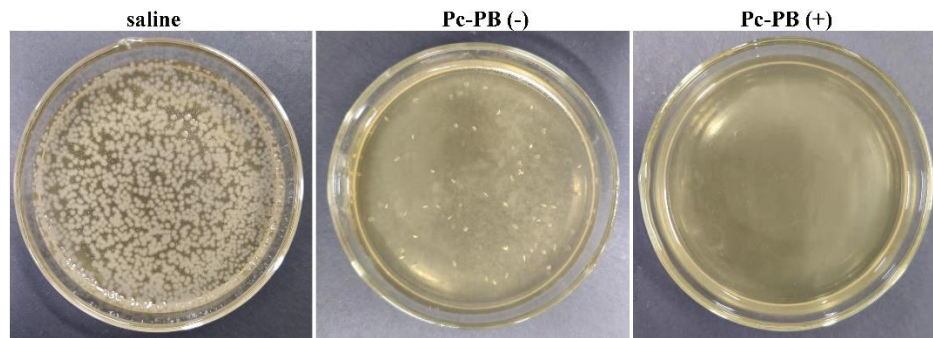

**Fig. S1.** Photographs of spread LB agar plate samples of bacteria from the wounds of different groups at the 2nd day after administration.

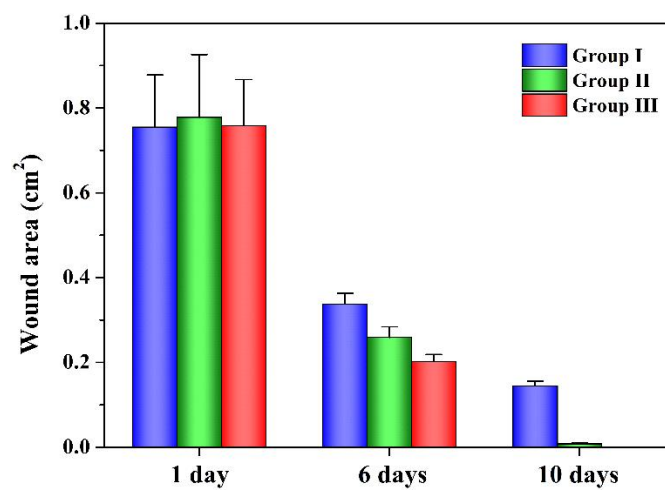

**Fig. S2.** Wound areas of different groups at 1 day, 6 days and 10 days after administration, respectively.
